# Supplementary material for: Dynamics and ionic conductivity of ionic liquid crystals forming a hexagonal columnar mesophase
Source: Royal Society of Chemistry journal article supplement (doi:10.1039/c7cp08186c), 2018-01-01
Supplement: c7cp08186c1.pdf [file c7cp08186c1.pdf]

## Supporting Information

### Dynamics and Ionic Conductivity of Ionic Liquid Crystals Forming a Hexagonal Columnar Mesophase

Arda Yildirim<sup>1</sup>, Paulina Szymoniak<sup>1</sup>, Kathrin Sentker<sup>2</sup>, Martin Butschies<sup>3</sup>,  
Andrea Bühlmeier<sup>3</sup>, Patrick Huber<sup>2</sup>, Sabine Laschat<sup>3</sup>, and Andreas Schönhals<sup>1,\*</sup>

<sup>1</sup>Bundesanstalt für Materialforschung und -prüfung (BAM), Unter den Eichen 87, 12205 Berlin, Germany

<sup>2</sup>Institut für Materialphysik und -technologie, Technische Universität Hamburg, Eißendorfer Str. 42, 21073 Hamburg, Germany

<sup>3</sup>Institut für Organische Chemie, Universität Stuttgart, Pfaffenwaldring 55, 70569 Stuttgart, Germany

#### Havriliak-Negami (HN) function to the experimental data

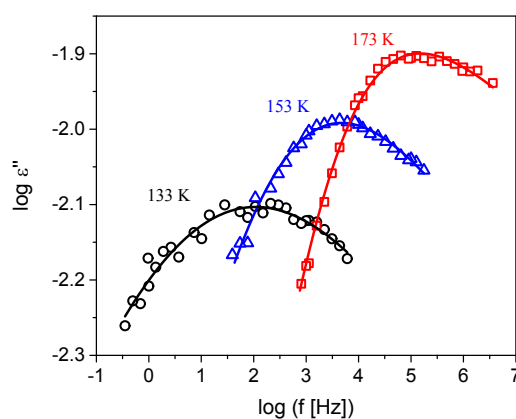

**Figure S1.** Frequency dependency of dielectric loss of LC536 for the second heating at different temperatures as indicated. Solid lines denote the fit by the HN-function to the corresponding data.

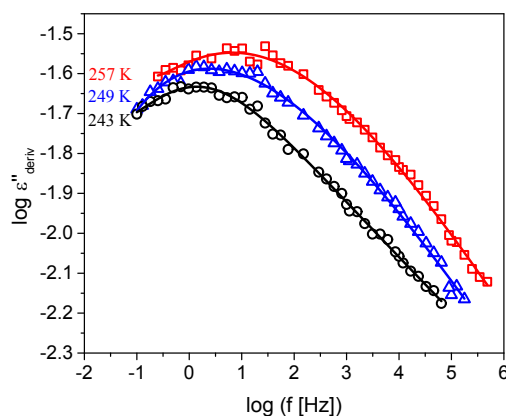

**Figure S2.** Frequency dependency of  $\varepsilon''_{\text{deriv}}$  of LC537 for the second heating at the indicated temperatures ( $\alpha$ -process). Solid lines are the fits of the HN-function given in Eq.5 to the data.

### Additional experimental results

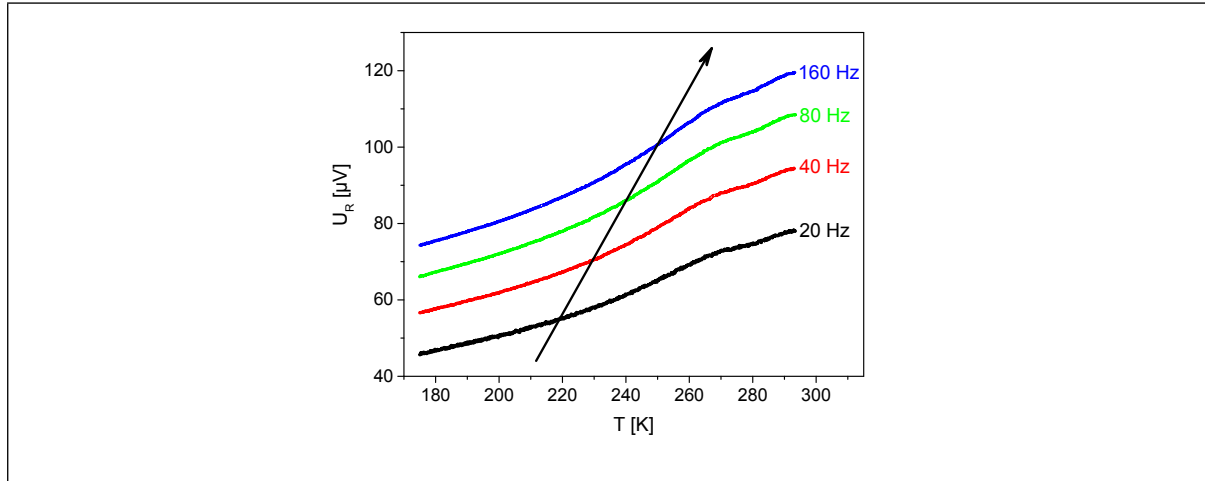

**Figure S3.** Temperature dependence of the real part of the complex differential voltage of LC537 during the cooling run at different frequencies as indicated. Black arrow - guide for the eyes.

### Fitting parameters of VFT and Arrhenius equations fitting to the conductivity data

VFT parameters and activation energies estimated from the fittings to the conductivity processes probed by BDS is given in Table S1. It is worth to note that the VFT fitting parameters are given only for the cooling runs due to the broader temperature range obtained for the  $\sigma_{\text{DC}}$  values for the cooling runs. Moreover,  $\log(\sigma_{\infty} [\text{S/cm}])$  was fixed to 1.3 for the cooling run of LC537 since the broader temperature range is obtained for the  $\sigma_{\text{DC}}$  values for LC536, and  $\log(\sigma_{\infty} [\text{Hz}])$  was found to be  $1.3 \pm 0.2$  from free fitting of VFT-equation to the data for LC536.

**Table S1.** VFT parameters and activation energies estimated from the fittings to the BDS data. To reduce the number of free fit parameters,  $\log(\sigma_{\infty} [\text{Hz}])$  was fixed to 1.3 for LC537.

| Material | Run                     | VFT (Col <sub>h</sub> phase)          |                  | Arrhenius (Cry <sub>1</sub> phase)    |                       |
|----------|-------------------------|---------------------------------------|------------------|---------------------------------------|-----------------------|
|          |                         | $\log(\sigma_{\infty} [\text{S/cm}])$ | $T_0 [\text{K}]$ | $\log(\sigma_{\infty} [\text{S/cm}])$ | $E_A [\text{kJ/mol}]$ |
| LC536    | 1 <sup>st</sup> Heating | -                                     | -                | $2.4 \pm 0.4$                         | $87 \pm 2$            |

|              |                         |               |             |               |            |
|--------------|-------------------------|---------------|-------------|---------------|------------|
|              | 1 <sup>st</sup> Cooling | $1.3 \pm 0.2$ | $179 \pm 3$ | $2.3 \pm 0.6$ | $87 \pm 3$ |
|              | 2 <sup>nd</sup> Heating | -             | -           | $2.6 \pm 0.4$ | $89 \pm 3$ |
|              | 1 <sup>st</sup> Heating | -             | -           | $1.3 \pm 0.6$ | $85 \pm 5$ |
| <b>LC537</b> | 1 <sup>st</sup> Cooling | 1.3           | $168 \pm 2$ | $1.2 \pm 0.5$ | $83 \pm 3$ |
|              | 2 <sup>nd</sup> Heating | -             | -           | $1.2 \pm 0.3$ | $84 \pm 2$ |
